# Supplementary material
Source: HighWire-hosted journal article supplement (https://tobaccocontrol.bmj.com/content/27/e1/e41)
Supplement: inline-supplementary-material-1 [file inline-supplementary-material-1.pdf]

Supplementary table 1. Observation Checklist

| Time                               | Location                                                                                              | OBSERVATIONAL ITEM                                                                                                                                                                                                                                                                                                                                                                                                                                                                                                                 | ACTIVITIES   | COMMENTS |
|------------------------------------|-------------------------------------------------------------------------------------------------------|------------------------------------------------------------------------------------------------------------------------------------------------------------------------------------------------------------------------------------------------------------------------------------------------------------------------------------------------------------------------------------------------------------------------------------------------------------------------------------------------------------------------------------|--------------|----------|
| Prior to the concert<br>( 2 weeks) | Crossroads, streets, , shops and “Indomaret” (outlet that sold the ticket) around Denpasar and Badung | Billboard                                                                                                                                                                                                                                                                                                                                                                                                                                                                                                                          | Photo        |          |
|                                    |                                                                                                       | Banner                                                                                                                                                                                                                                                                                                                                                                                                                                                                                                                             | Photo        |          |
|                                    |                                                                                                       | Others                                                                                                                                                                                                                                                                                                                                                                                                                                                                                                                             | Photo        |          |
| 1 <sup>st</sup> Day (3 Sep 2016)   | Street on the way to GWK                                                                              | Billboard, banner, other promotional item                                                                                                                                                                                                                                                                                                                                                                                                                                                                                          | Photo & Note |          |
|                                    | GWK entrance                                                                                          | Billboard, banner, decoration on the gate etc                                                                                                                                                                                                                                                                                                                                                                                                                                                                                      | Photo & Note |          |
|                                    | Street of GWK to the Venue (Lotus Pond)                                                               | Billboard, banner, decoration on the gate, etc                                                                                                                                                                                                                                                                                                                                                                                                                                                                                     | Photo & Note |          |
|                                    | Entrance to the venue                                                                                 | Decoration                                                                                                                                                                                                                                                                                                                                                                                                                                                                                                                         | Photo & Note |          |
|                                    |                                                                                                       | On site ticket booth                                                                                                                                                                                                                                                                                                                                                                                                                                                                                                               | Photo & Note |          |
|                                    |                                                                                                       | ID checking                                                                                                                                                                                                                                                                                                                                                                                                                                                                                                                        | Photo & Note |          |
|                                    |                                                                                                       | Merchandise                                                                                                                                                                                                                                                                                                                                                                                                                                                                                                                        | Photo & Note |          |
|                                    |                                                                                                       | Other type of promotion                                                                                                                                                                                                                                                                                                                                                                                                                                                                                                            | Photo & Note |          |
|                                    | Inside the venue                                                                                      | Stage (number of stage, decoration)                                                                                                                                                                                                                                                                                                                                                                                                                                                                                                | Photo & Note |          |
|                                    |                                                                                                       | Activity/Creativity Booths <ul style="list-style-type: none"> <li>- Name of the booths</li> <li>- Decoration</li> <li>- Activity offered</li> <li>- Any jargons for the booth</li> <li>- Prizes/merchandise for the activity given in the booth</li> <li>- Sales promotion (SPG, discount voucher etc)</li> <li>- Free cigarette distribution</li> <li>- People engage in the activity (number/qualitatively, sex, age group)</li> <li>- Use of social media/encourage to use certain hashtag</li> <li>- People smoking</li> </ul> | Photo & Note |          |
|                                    |                                                                                                       | Area of concert <ul style="list-style-type: none"> <li>- Decoration</li> <li>- Free cigarette distribution</li> <li>- Sales promotion (SPG etc.)</li> <li>- People smoking</li> </ul>                                                                                                                                                                                                                                                                                                                                              | Photo & Note |          |
|                                    | Opening of the concert                                                                                | MC/ Organizing committee/spoke-person: <ul style="list-style-type: none"> <li>- Acknowledge cigarette company (HM Sampoerna)</li> <li>- Any promotion about cigarette (A Mild or others; including the new limited edition packaging)</li> <li>- Any statement of linkage of smoking and creativity/youth</li> </ul>                                                                                                                                                                                                               | Photo & Note |          |

|                                 |                    |                                                                                                                                                                                                                                                                                                                    |              |  |
|---------------------------------|--------------------|--------------------------------------------------------------------------------------------------------------------------------------------------------------------------------------------------------------------------------------------------------------------------------------------------------------------|--------------|--|
|                                 |                    | etc<br>- Other interesting activities/statement                                                                                                                                                                                                                                                                    |              |  |
|                                 | During the concert | MC and Artist<br>- Acknowledge cigarette company (HM Sampoerna)<br>- Any promotion about cigarette (A Mild or others; including the new limited edition packaging)<br>- Any statement of linkage of smoking and creativity/youth etc)<br>- Door prizes<br>- Other promotional and interesting activities/statement | Photo & Note |  |
|                                 | End of the concert | Other promotional and interesting activities/statement                                                                                                                                                                                                                                                             | Photo & Note |  |
| 2 <sup>nd</sup> Day (4 Sept 16) | The same to day 1  | Any new/additional promotion items                                                                                                                                                                                                                                                                                 | Photo & Note |  |
