# Supplementary material
Source: HighWire-hosted journal article supplement (https://tobaccocontrol.bmj.com/content/27/e1/e41)
Supplement: inline-supplementary-material-2 [file inline-supplementary-material-2.pdf]

Supplementary Table 2. SoundrenAline concert from 2002-2016

| Year | Concert                   | Title/theme               | Venue                                            | Notes                                                                                                                             |
|------|---------------------------|---------------------------|--------------------------------------------------|-----------------------------------------------------------------------------------------------------------------------------------|
| 2002 | A Mild Live SoundrenAline | Experience 'Em All        | Jakarta                                          | First concert - audience of 45,000                                                                                                |
| 2003 | A Mild Live SoundrenAline | The boldest Music Act     | Medan, Bandung, Jakarta, Bali, Surabaya          | Held in several cities for the first time                                                                                         |
| 2004 | A Mild Live SoundrenAline | Make Music Not War        | Malang, Padang, Makassar, Jakarta                | First time to feature international artist                                                                                        |
| 2005 | A Mild Live SoundrenAline | Reborn Republic           | Bali, Surabaya, Bandung, Semarang, Palembang     | Encouraged Indonesians to revive                                                                                                  |
| 2006 | A Mild Live SoundrenAline | Rock United               | Banjarmasin, Makassar, Pekanbaru, Medan, Jakarta | A Mild live concert encouraged music maniacs to unite                                                                             |
| 2007 | A Mild Live SoundrenAline | Sounds of Change          | Padang, Palembang, Bandung, Surabaya, Bali       | Best band to be given an international trip as a prize                                                                            |
| 2008 | A Mild Live SoundrenAline | Free Your Voice           | Prambanan, Batam, Medan, Pekanbaru, Malang.      | Best band to be given an international trip as a prize                                                                            |
| 2009 | A Mild Live SoundrenAline | Lead The Beat             | Bali                                             | An "A" Experience SoundrenAline, held in several cities; 3 winners to perform in Bali                                             |
| 2010 | NO CONCERT                |                           |                                                  |                                                                                                                                   |
| 2011 | A Mild Live SoundrenAline | Make Yourself Heard       | Pekanbaru                                        | Inspire fans to be bold to show creative ideas align with Go Ahead Spirit; Held in 10 cities                                      |
| 2012 | A Mild Live SoundrenAline | Rhythm Revival            | Tangerang/Jakarta                                | "Road to SoundrenAline Rhythm Revival 2012" in 4 cities                                                                           |
| 2013 | A SoundrenAline           | A Journey of Rock Harmony | Yogyakarta                                       | Celebration of 10 years of success Road to SoundrenAline in 4 cities involving local artists from each city                       |
| 2014 | SoundrenAline             | Voice of Choice           | Surabaya, Medan                                  | Engage people to select one album from the performing bands through GoAheadPeople.com. Top album will be performed at the concert |
| 2015 | SoundrenAline             | Change The Ordinary       | Bali                                             | SoundSAtion; Road to SoundrenAline Tour of famous                                                                                 |

|      |               |                  |      |                                                                                                                                                                                                                                                                                                                                       |
|------|---------------|------------------|------|---------------------------------------------------------------------------------------------------------------------------------------------------------------------------------------------------------------------------------------------------------------------------------------------------------------------------------------|
|      |               |                  |      | national artists in 15 cities                                                                                                                                                                                                                                                                                                         |
| 2016 | SoundrenAline | Louder Than Ever | Bali | - Multi genre music; engage through market place, interactive booths                                                                                                                                                                                                                                                                  |
| 2017 | SoundrenAline | United We Loud   | Bali | <ul style="list-style-type: none"> <li>- SoundsAktion: The Tour, featuring Barasuara, a rising Indie Band, commenced in Surabaya (4/3/17), the title: <i>"Berisik Gue Berisi"</i> (Noisy but full),</li> <li>- Photo booth with new Sampoerna slogan <i>"nanti juga Lo Paham"</i> (later/eventually, You will understand)"</li> </ul> |
